# Supplementary material
Source: Research Square preprint supplement (doi:10.21203/rs.3.rs-8907204/v1)
Supplement: Supplementary file 1 [file e9ff8c3a08104fa810a01a91.docx]

**Table 1s.** Risk of Bias Assessment using the RoB 2 Tool.

| **Study** | **Randomization Process** | **Deviations from Intended Interventions (Performance Bias)** | **Missing Outcome Data (Attrition Bias)** | **Measurement of the Outcome (Detection Bias)** | **Selection of the Reported Result (Reporting Bias)** | **Overall Risk of Bias** |
| --- | --- | --- | --- | --- | --- | --- |
| Coratella 2019 (61) | Low | High | Low | Moderate | Low | Moderate |
| de Hoyo 2015 (65) | Low | High | Low | Moderate | Low | Moderate |
| Edvard 2020(20) | Low | Moderate | Low | Low | Low | Moderate |
| Raya‑González  2021(66) | Low | High | Low | Moderate | Low | Moderate |
| Nuñez 2019 | Low | High | Low | Moderate | Low | Moderate |
| Jarosz 2023 | Low | High | Low | Low | Low | Moderate |
| Pecci 2023 | Low | High | Low | Moderate | Low | Moderate |
| Fajardo 2016(21) | Low | High | Low | Moderate | Low | Moderate |

**Table 2s.** GRADE Certainty of Evidence Table for the Main Outcomes.

| **Outcome** | **No. of Studies** | **Study Design** | **Risk of Bias** | **Inconsistency** | **Indirectness** | **Imprecision** | **Publication Bias** | **Certainty (GRADE)** |
| --- | --- | --- | --- | --- | --- | --- | --- | --- |
| CMJ Height | 7 | RCTs | Moderate | Not serious | Not serious | Serious | Unlikely | Moderate |
| 10‑m Sprint Time | 6 | RCTs | Moderate | Not serious | Not serious | Serious | Unlikely | Moderate |
| 20‑m Sprint Time | 4 | RCTs | Moderate | Not serious | Not serious | Serious | Unlikely | Low–Moderate |
| 30‑m Sprint Time | 4 | RCTs | Moderate | Serious | Not serious | Serious | Unlikely | Low |
| COD Performance | 4 | RCTs | Moderate | Serious | Not serious | Serious | Unlikely | Low |


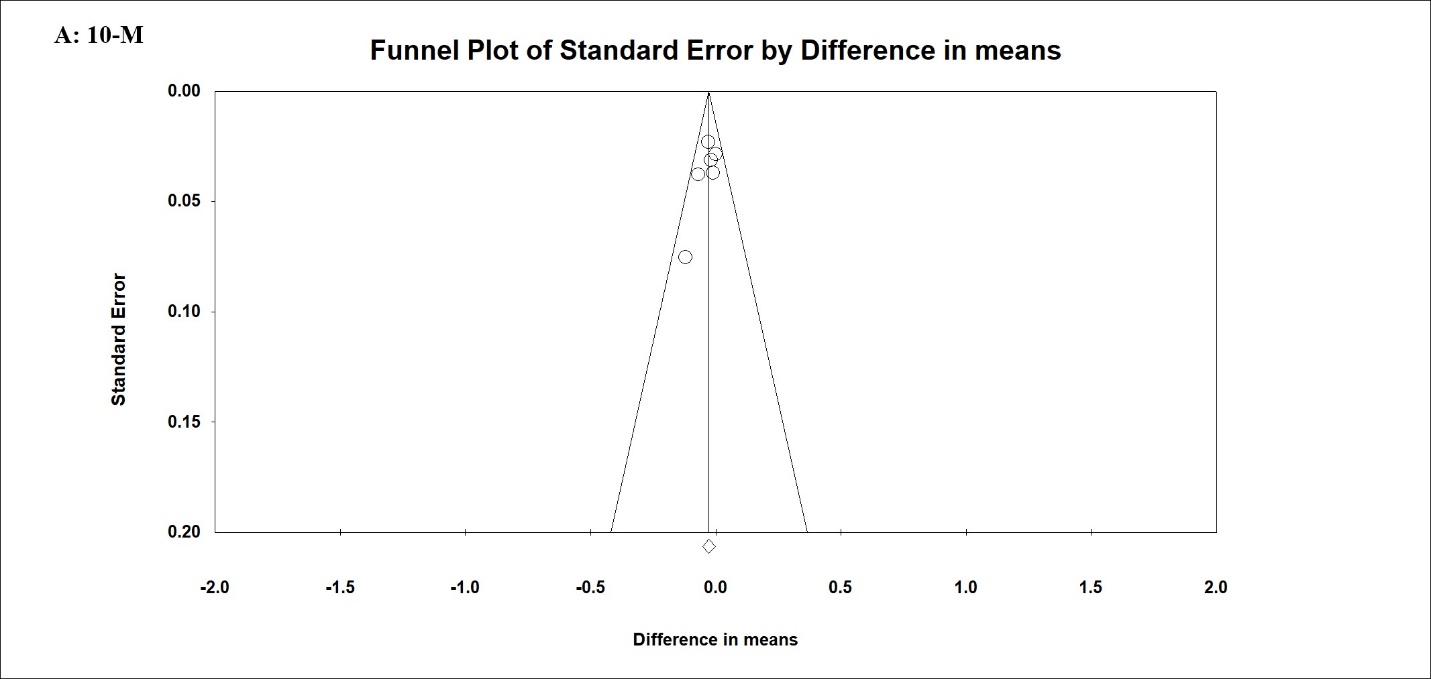


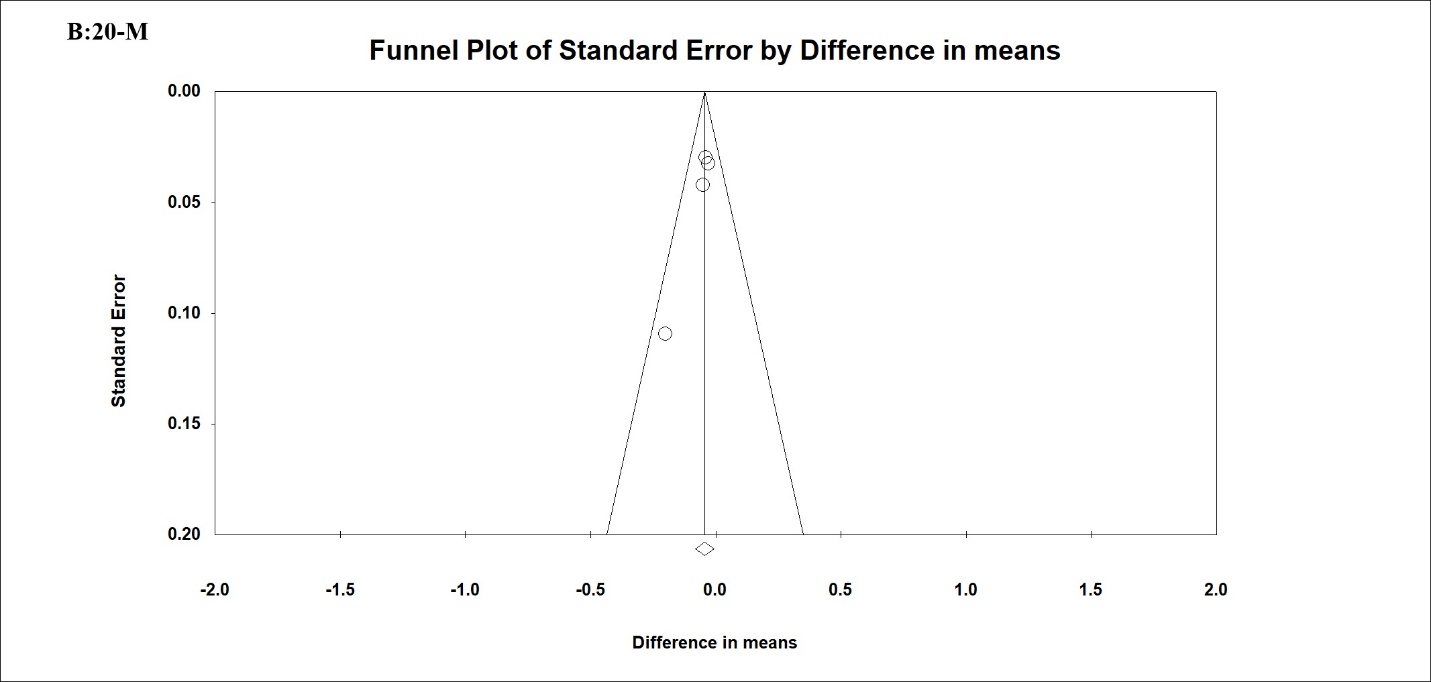


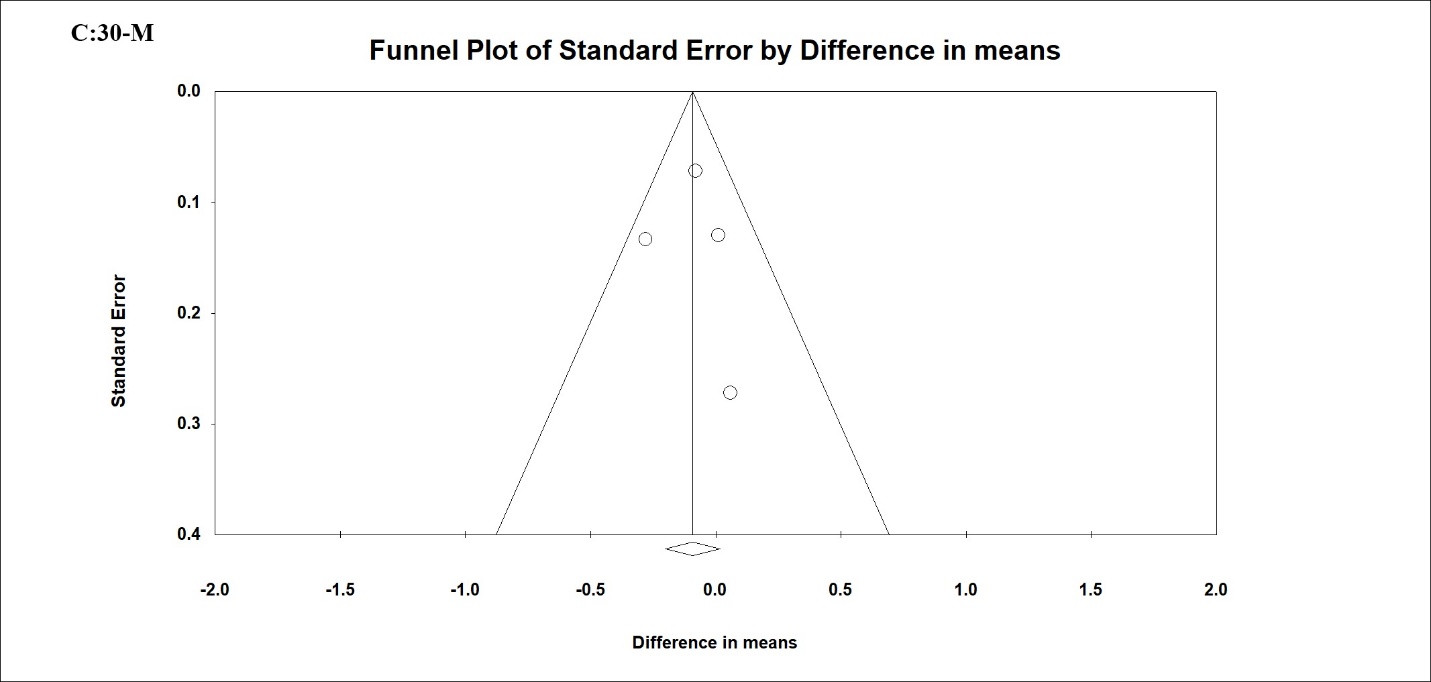


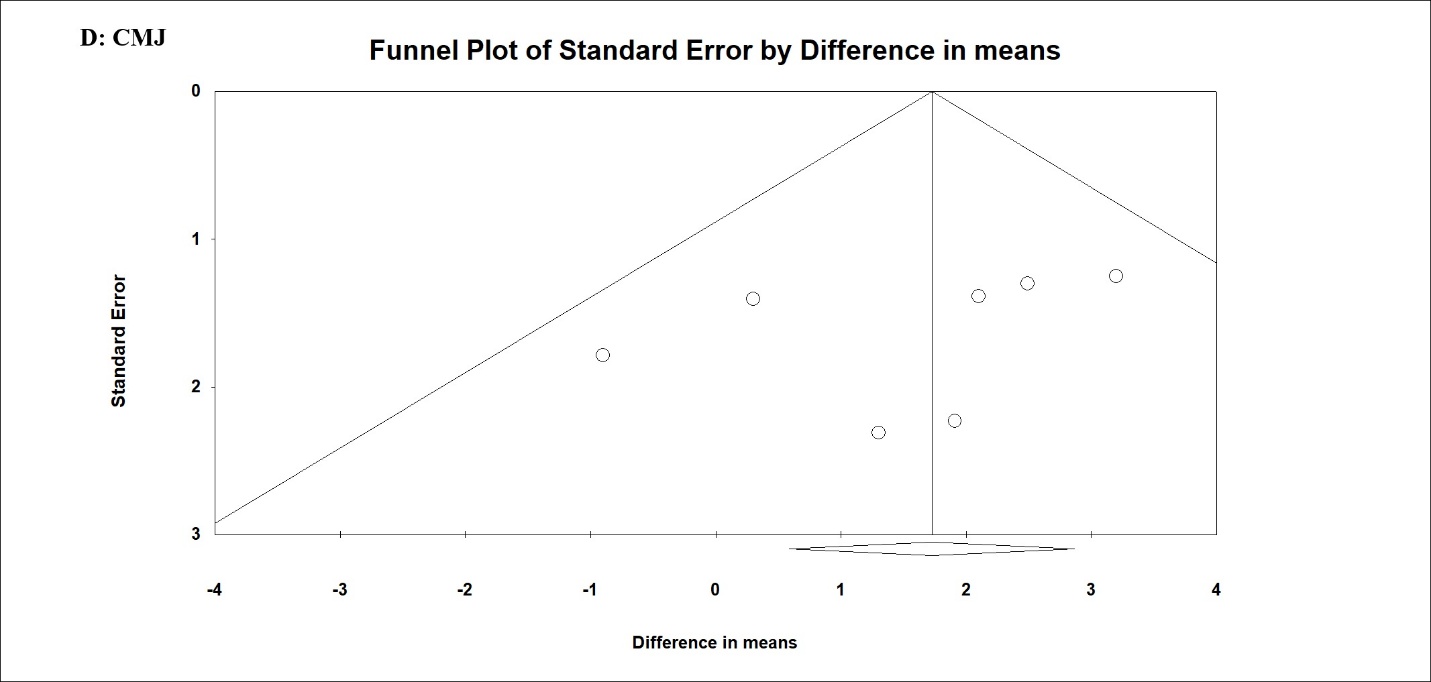


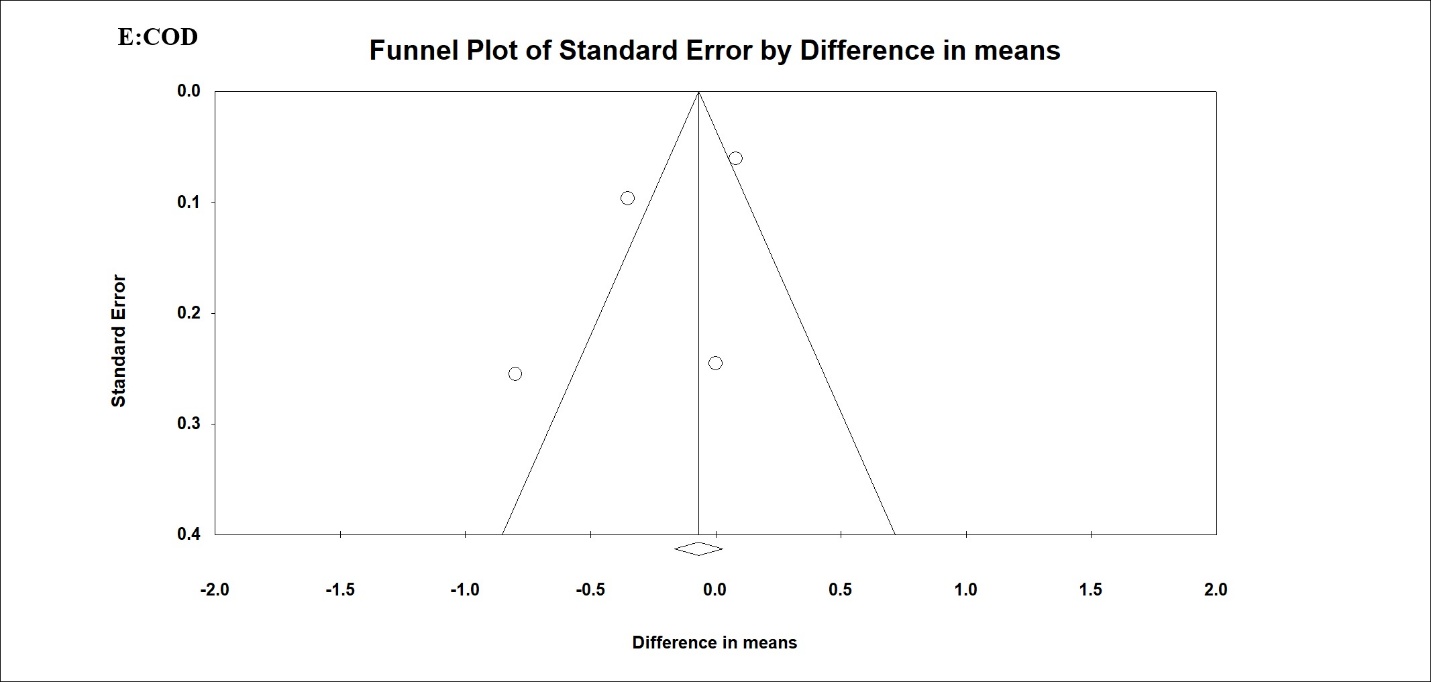


**Fig. 1s. Panels A–E.** Funnel plot of standard error by difference in means.


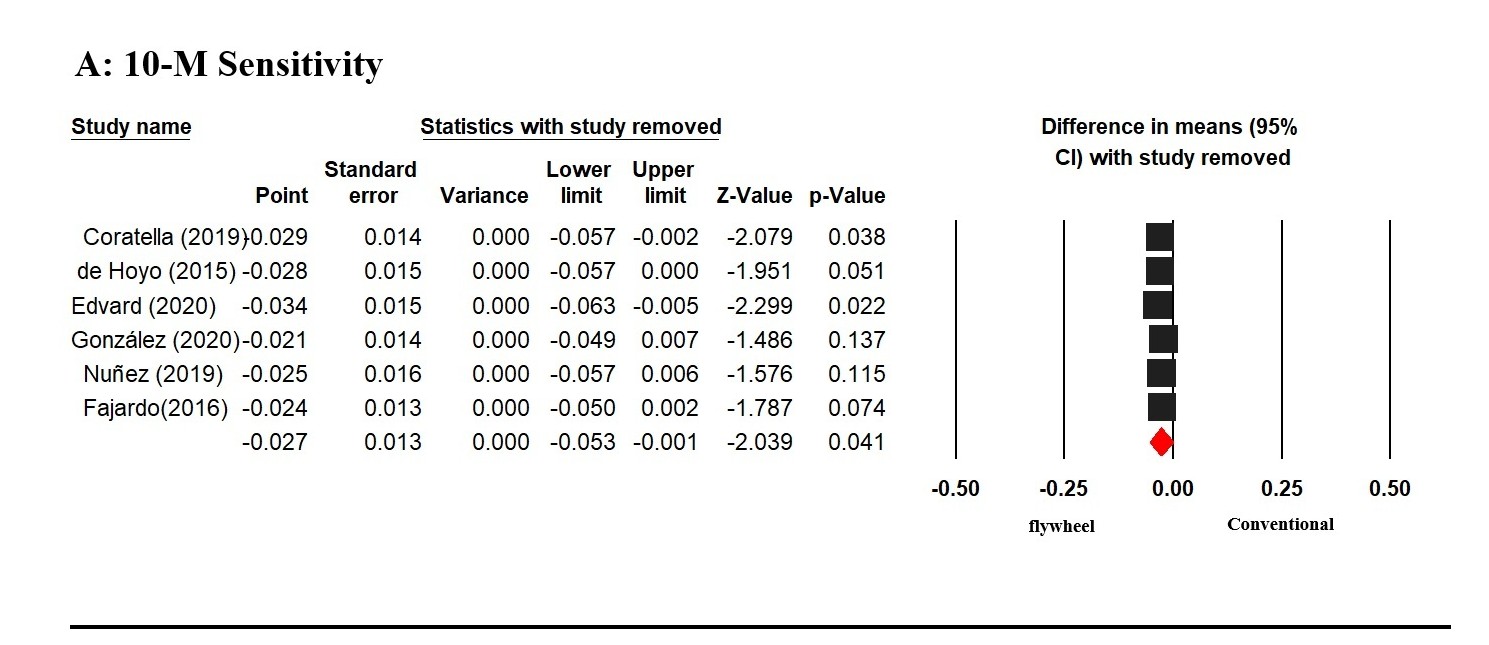


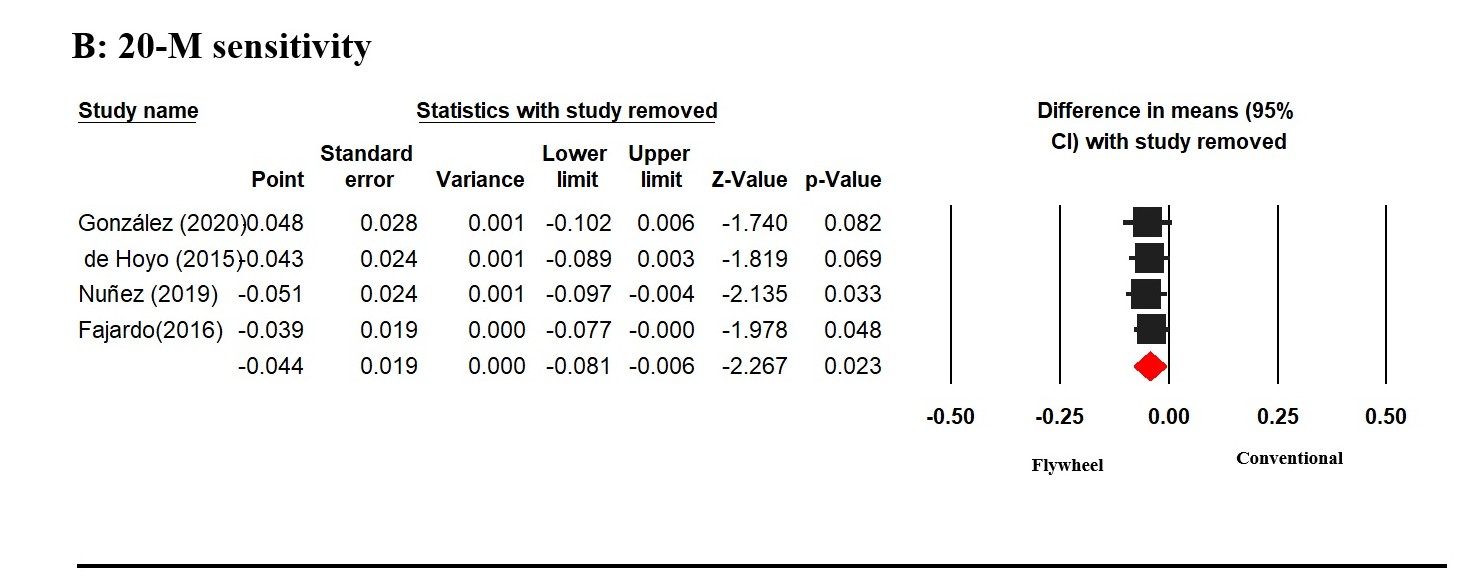


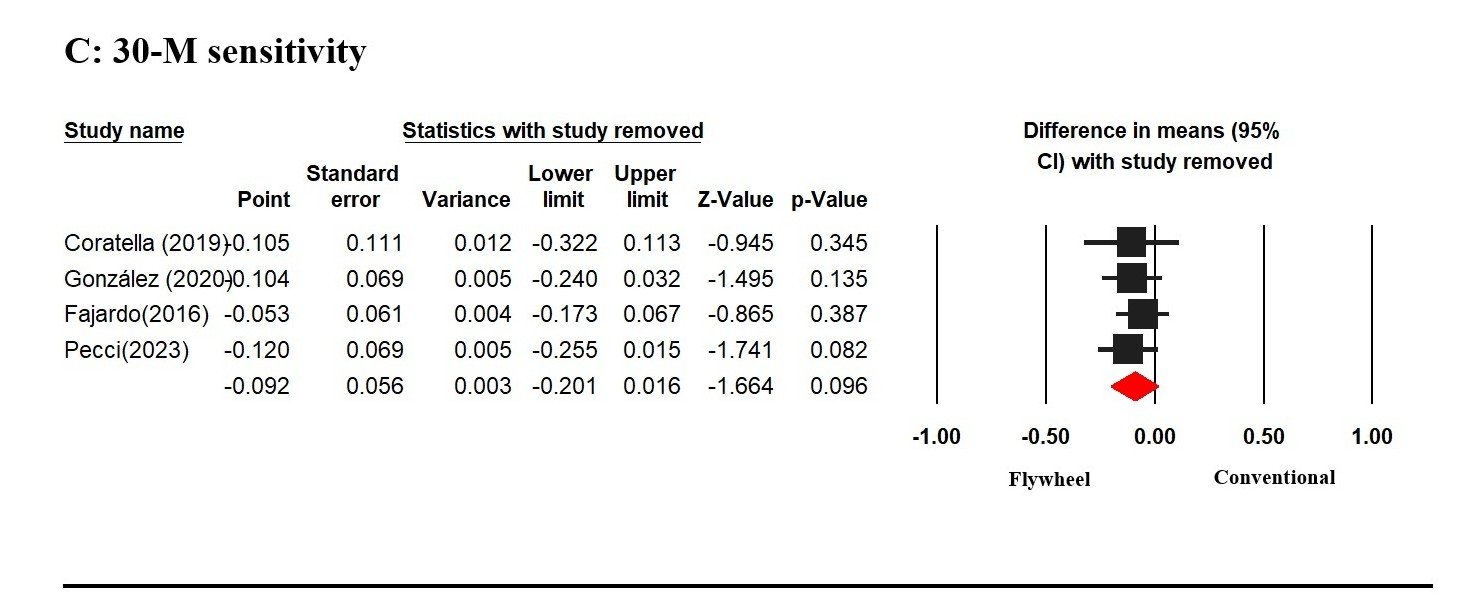


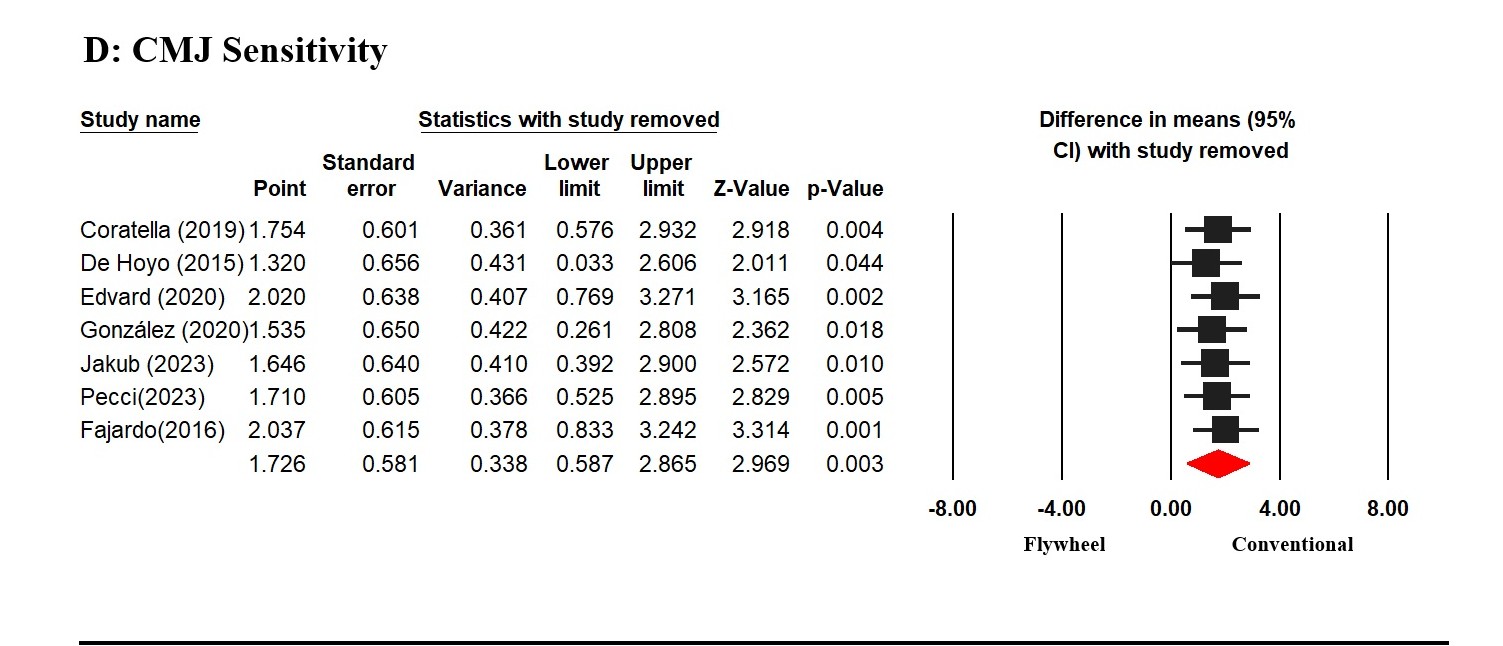


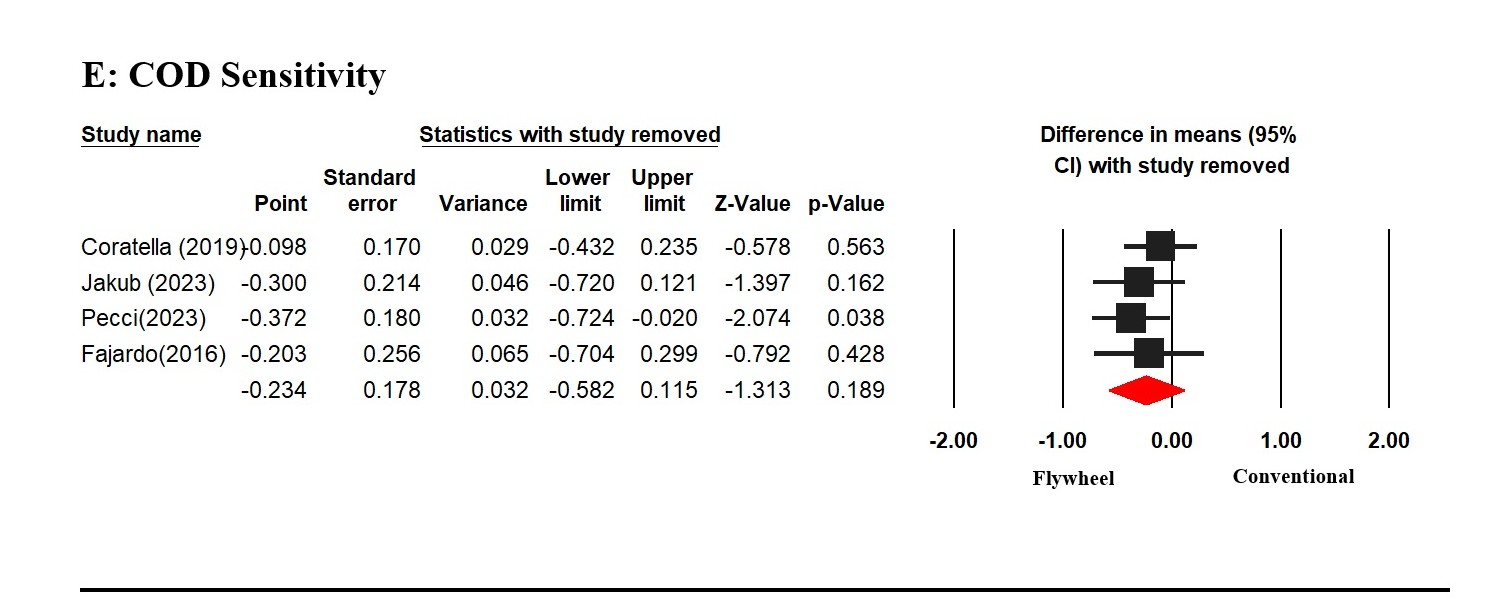


**Fig. 2s. Panels A–E.** Forest plot of sensitivity analysis by one leave out test.
